# Supplementary material for: Nanoporous lanthanide-carboxylate frameworks based on 5-nitroisophthalic acid
Source: Royal Society of Chemistry journal article supplement (doi:10.1039/b914879e), 2009-12-15
Supplement: b914879e.pdf [file b914879e.pdf]

## Supporting Information

**Table S1** Selected Bond Lengths(Å) and Angles (°) for complexes **1-3**.

|                     | 1          |                     | 2          |                     | 3          |
|---------------------|------------|---------------------|------------|---------------------|------------|
| Nd(1)- (4)#1        | 2.372(3)   | Dy(1)-O(1)          | 2.443(5)   | Ho(1)-O(8)#1        | 2.271(5)   |
| Nd(1)- O(8)         | 2.398(3)   | Dy(1)-O(8)#2        | 2.339(4)   | Ho(1)-O(3)          | 2.309(5)   |
| Nd(1)- O(11)        | 2.417(3)   | Dy(1)-O(7)          | 2.315(4)   | Ho(1)-O(4)#2        | 2.323(5)   |
| Nd(1)- O(7)#2       | 2.446(3)   | Dy(1)-O(10)         | 2.408(6)   | Ho(1)-O(7)#3        | 2.338(5)   |
| Nd(1)- O(3)#3       | 2.449(3)   | Dy(1)-O(2)          | 2.432(4)   | Ho(1)-O(6)          | 2.359(7)   |
| Nd(1)- O(10)        | 2.499(3)   | Dy(1)-O(11)         | 2.361(6)   | Ho(1)-O(5)          | 2.396(7)   |
| Nd(1)- O(2)         | 2.513(3)   | Dy(1)-O(3) #3       | 2.354(4)   | Ho(1)-O(1)          | 2.419(5)   |
| Nd(1)- O(1)         | 2.551(3)   | Dy(1)-O(4) #1       | 2.279(4)   | Ho(1)-O(2)          | 2.435(5)   |
| O(4)#1-Nd(1)-O(8)   | 73.99(11)  | O(4)#1-Dy(1)-O(7)   | 76.00(16)  | O(8)#1-Ho(1)-O(3)   | 75.93(19)  |
| O(4)#1-Nd(1)-O(11)  | 147.73(11) | O(4)#1-Dy(1)-O(8)#2 | 80.29(17)  | O(8)#1-Ho(1)-O(4)#2 | 80.28(19)  |
| O(8)-Nd(1)-O(11)    | 138.23(11) | O(7)-Dy(1)-O(8)#2   | 125.43(15) | O(3)-Ho(1)-O(4)#2   | 125.20(18) |
| O(4)#1-Nd(1)-O(7)#2 | 78.34(11)  | O(4)#1-Dy(1)-O(3)#3 | 124.98(18) | O(8)#1-Ho(1)-O(7)#3 | 124.7(2)   |
| O(8)-Nd(1)-O(7)#2   | 123.68(10) | O(7)-Dy(1)-O(3)#3   | 78.36(16)  | O(3)-Ho(1)-O(7)#3   | 78.16(19)  |
| O(11)-Nd(1)-O(7)#2  | 79.22(11)  | O(8)#2-Dy(1)-O(3)#3 | 76.46(16)  | O(4)#2-Ho(1)-O(7)#3 | 76.33(18)  |
| O(4)#1-Nd(1)-O(3)#3 | 122.26(11) | O(4)#1-Dy(1)-O(11)  | 145.7(2)   | O(8)#1-Ho(1)-O(6)   | 146.1(2)   |
| O(8)-Nd(1)-O(3)#3   | 77.99(11)  | O(7)-Dy(1)-O(11)    | 138.3(2)   | O(3)-Ho(1)-O(6)     | 138.0(2)   |
| O(11)-Nd(1)-O(3)#3  | 74.10(11)  | O(8)#2-Dy(1)-O(11)  | 77.9(2)    | O(4)#2-Ho(1)-O(6)   | 78.1(2)    |
| O(7)#2-Nd(1)-O(3)#3 | 77.02(10)  | O(3)#3-Dy(1)-O(11)  | 74.7(2)    | O(7)#3-Ho(1)-O(6)   | 74.6(2)    |
| O(4)#1-Nd(1)-O(10)  | 76.00(12)  | O(4)#1-Dy(1)-O(10)  | 78.2(2)    | O(8)#1-Ho(1)-O(5)   | 78.6(3)    |
| O(8)-Nd(1)-O(10)    | 139.90(12) | O(7)-Dy(1)-O(10)    | 142.8(2)   | O(3)-Ho(1)-O(5)     | 143.2(3)   |
| O(11)-Nd(1)-O(10)   | 75.79(12)  | O(8)#2-Dy(1)-O(10)  | 75.0(2)    | O(4)#2-Ho(1)-O(5)   | 75.0(2)    |
| O(7)#2-Nd(1)-O(10)  | 74.29(11)  | O(3)#3-Dy(1)-O(10)  | 138.8(2)   | O(7)#3-Ho(1)-O(5)   | 138.6(3)   |
| O(3)#3-Nd(1)-O(10)  | 141.53(11) | O(11)-Dy(1)-O(10)   | 70.8(3)    | O(6)-Ho(1)-O(5)     | 70.7(3)    |
| O(4)#1-Nd(1)-O(2)   | 94.54(12)  | O(4)#1-Dy(1)-O(2)   | 89.80(18)  | O(8)#1-Ho(1)-O(1)   | 89.5(2)    |
| O(8)-Nd(1)-O(2)     | 81.44(11)  | O(7)-Dy(1)-O(2)     | 79.89(17)  | O(3)-Ho(1)-O(1)     | 79.7(2)    |
| O(11)-Nd(1)-O(2)    | 93.05(12)  | O(8)#2-Dy(1)-O(2)   | 148.46(15) | O(4)#2-Ho(1)-O(1)   | 148.67(18) |
| O(7)#2-Nd(1)-O(2)   | 149.34(10) | O(3)#3-Dy(1)-O(2)   | 131.85(16) | O(7)#3-Ho(1)-O(1)   | 132.03(18) |
| O(3)#3-Nd(1)-O(2)   | 129.66(10) | O(11)-Dy(1)-O(2)    | 95.1(2)    | O(6)-Ho(1)-O(1)     | 95.5(2)    |
| O(10)-Nd(1)-O(2)    | 75.05(11)  | O(10)-Dy(1)-O(2)    | 73.7(2)    | O(5)-Ho(1)-O(1)     | 74.0(2)    |
| O(4)#1-Nd(1)-O(1)   | 134.71(11) | O(4)#1-Dy(1)-O(1)   | 135.10(16) | O(8)#1-Ho(1)-O(2)   | 134.96(19) |
| O(8)-Nd(1)-O(1)     | 72.18(10)  | O(7)-Dy(1)-O(1)     | 72.89(17)  | O(3)-Ho(1)-O(2)     | 72.7(2)    |
| O(11)-Nd(1)-O(1)    | 72.25(11)  | O(8)#2-Dy(1)-O(1)   | 144.56(16) | O(4)#2-Ho(1)-O(2)   | 144.67(18) |
| O(7)#2-Nd(1)-O(1)   | 146.46(10) | O(3)#3-Dy(1)-O(1)   | 78.98(16)  | O(7)#3-Ho(1)-O(2)   | 78.98(18)  |
| O(3)#3-Nd(1)-O(1)   | 78.49(10)  | O(11)-Dy(1)-O(1)    | 71.2(2)    | O(6)-Ho(1)-O(2)     | 71.2(2)    |
| O(10)- Nd(1)-O(1)   | 114.07(11) | O(10)-Dy(1)-O(1)    | 109.5(2)   | O(5)-Ho(1)-O(2)     | 109.6(2)   |
| O(2)-Nd(1)-O(1)     | 51.47(10)  | O(2)-Dy(1)-O(1)     | 53.62(15)  | O(1)-Ho(1)-O(2)     | 53.86(18)  |

(Symmetry transformations used to generate equivalent atoms: for **1**: #1,  $-x+3/2, y+1/2, -z+3/2$ ; #2,  $-x+3/2, -y+3/2, -z+1$ ; #3,  $x, -y+1, z-1/2$ . for **2**: #1,  $-x+3/2, y+1/2, -z+3/2$ ; #2,  $-x+3/2, -y+1/2, -z+1$ ; #3  $x, -y, z-1/2$ . for **3**: #1,  $-x+3/2, y-1/2, -z+1/2$ ; #2,  $-x+3/2, -y+1/2, -z$ ; #3,  $x, -y+1, z-1/2$ .)

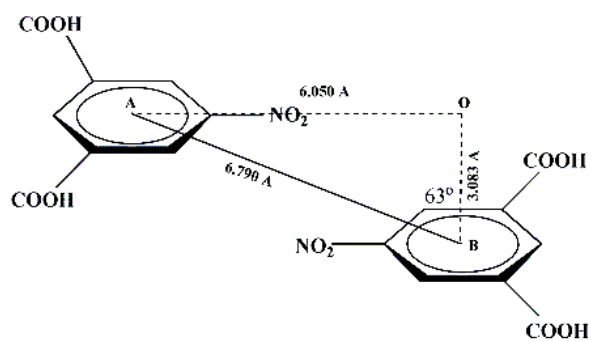

**Fig. S1** The illustrated distances of the near 5-nip ligands in the 2D network in **1**.

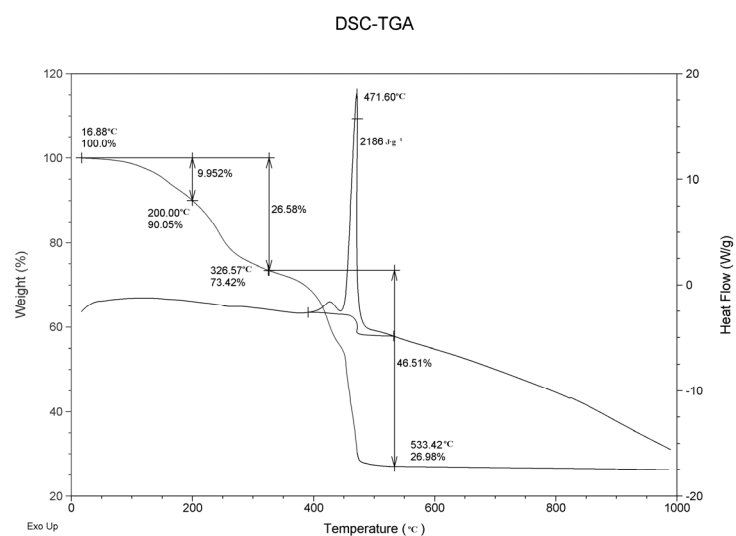

**Fig. S2** The TG - DSC curve of **2** at heat rate of  $10\text{ }^{\circ}\text{C min}^{-1}$ .

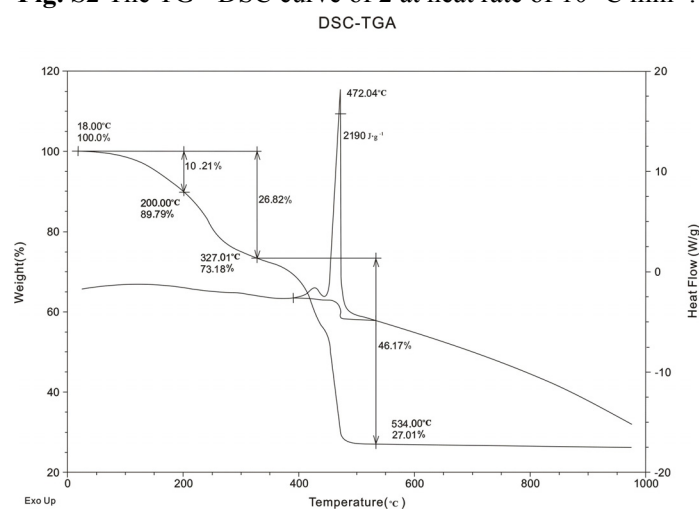

**Fig. S3** TGA - DSC curves for the soaked sample with DMF of the guest-free **2** at  $200\text{ }^{\circ}\text{C}$  at heat rate of  $10\text{ }^{\circ}\text{C min}^{-1}$ .
